# Supplementary material for: Molecular design of N–NO2substituted cycloalkanes derivatives Cm(N–NO2)mfor energetic materials with high detonation performance and low impact sensitivity
Source: Royal Society of Chemistry journal article supplement (doi:10.1039/c5ra04509f), 2015-01-01
Supplement: c5ra04509f1.pdf [file c5ra04509f1.pdf]

## Supporting Information

### **Molecular design of N-NO<sub>2</sub> substituted cycloalkanes derivatives C<sub>m</sub>(N-NO<sub>2</sub>)<sub>m</sub> for energetic materials with high detonation performance and low impact sensitivity**

Yan-Yan Guo,<sup>a</sup> Wei-Jie Chi,<sup>a</sup> Ze-Sheng Li,<sup>\*,a,b</sup> and Quan-Song Li<sup>\*,a,b</sup>

<sup>a</sup> Beijing Key Laboratory of Photoelectronic/Electrophotonic Conversion Materials, Key Laboratory of Cluster Science of Ministry of Education, Beijing Key Laboratory for Chemical Power Source and Green Catalysis, School of Chemistry, Beijing Institute of Technology, Beijing 100081, China

<sup>b</sup> The Academy of Fundamental and Interdisciplinary Sciences, Harbin Institute of Technology, Harbin 150080, China.

**Table S1** The coordinates of C3

| atom | X           | Y           | Z           |
|------|-------------|-------------|-------------|
| C    | -0.82459800 | 0.16662700  | -0.00006200 |
| C    | 0.55672200  | 0.63107100  | 0.00005500  |
| C    | 0.26826000  | -0.79738300 | -0.00001100 |
| N    | 1.32169700  | 1.64625300  | 0.00006500  |
| N    | 0.76503300  | -1.96741000 | 0.00003800  |
| N    | -2.08628700 | 0.32119600  | -0.00012700 |
| N    | -2.48294700 | 1.73734500  | -0.00005200 |
| O    | -2.66399500 | 2.21489500  | 1.09793500  |
| O    | -2.66400700 | 2.21496600  | -1.09800500 |
| N    | -0.26355900 | -3.01844300 | -0.00008100 |
| O    | -0.58704700 | -3.41381300 | 1.09785700  |
| O    | -0.58662300 | -3.41395000 | -1.09809200 |
| N    | 2.74644100  | 1.28101200  | 0.00014100  |
| O    | 3.25056200  | 1.19873700  | -1.09779800 |
| O    | 3.25049100  | 1.19897000  | 1.09813100  |

**Table S2** The coordinates of C4

| atom | X           | Y           | Z           |
|------|-------------|-------------|-------------|
| C    | -0.16976900 | -1.05136700 | -0.00025000 |
| C    | -1.05134000 | 0.16968300  | 0.00003600  |
| C    | 0.16970300  | 1.05124600  | 0.00038200  |
| C    | 1.05126600  | -0.16977400 | -0.00014900 |
| N    | 0.26511100  | 2.31691400  | 0.00071100  |
| N    | -2.31699400 | 0.26506500  | -0.00021100 |
| N    | -0.26486000 | -2.31702000 | -0.00031600 |
| N    | 2.31689600  | -0.26495100 | -0.00024300 |
| N    | 1.64485400  | 2.81526000  | 0.00040000  |
| O    | 2.10561400  | 3.03149600  | 1.09868800  |
| O    | 2.10442500  | 3.03305300  | -1.09811200 |
| N    | -2.81525400 | 1.64507700  | -0.00018300 |
| O    | -3.03208600 | 2.10527100  | 1.09819100  |
| O    | -3.03234600 | 2.10496900  | -1.09865600 |
| N    | 2.81550800  | -1.64496600 | -0.00053400 |
| O    | 3.03217000  | -2.10494300 | -1.09903500 |
| O    | 3.03298200  | -2.10514500 | 1.09772200  |
| N    | -1.64532300 | -2.81534200 | 0.00031800  |
| O    | -2.10433100 | -3.03296700 | 1.09902300  |
| O    | -2.10626900 | -3.03160600 | -1.09778400 |

**Table S3** The coordinates of C5

| atom | X           | Y           | Z           |
|------|-------------|-------------|-------------|
| C    | 0.32868600  | 1.22879400  | 0.00009200  |
| C    | 1.27004400  | 0.06723200  | -0.00018100 |
| C    | 0.45619100  | -1.18698000 | 0.00006200  |
| C    | -0.98825400 | -0.80052000 | 0.00020700  |
| C    | -1.06687000 | 0.69257300  | 0.00046000  |
| N    | 2.53107100  | 0.26395400  | -0.00054800 |
| N    | 1.03273900  | -2.32554700 | 0.00002600  |
| N    | -1.89273300 | -1.70083200 | 0.00032000  |
| N    | -2.20257200 | 1.27480300  | 0.00005400  |
| N    | 0.53174000  | 2.48881000  | 0.00060800  |
| N    | 3.39649500  | -0.90896400 | -0.00076100 |
| O    | 3.74472500  | -1.27834500 | -1.09928500 |
| O    | 3.74448900  | -1.27885200 | 1.09769900  |
| N    | 1.91447500  | 2.94875700  | 0.00067900  |
| O    | 2.37374400  | 3.16528800  | 1.09921100  |
| O    | 2.37377800  | 3.16538400  | -1.09782800 |
| N    | -2.21370100 | 2.73183800  | -0.00046200 |
| O    | -2.27811700 | 3.23593700  | 1.09788200  |
| O    | -2.27836700 | 3.23527300  | -1.09909200 |
| N    | -3.28235300 | -1.26104700 | -0.00010500 |
| O    | -3.78157800 | -1.16669200 | 1.09827700  |
| O    | -3.78107300 | -1.16705700 | -1.09876400 |
| N    | 0.18506500  | -3.51076100 | 0.00044300  |
| O    | -0.05848200 | -3.95617200 | 1.09910700  |
| O    | -0.05916200 | -3.95647300 | -1.09791200 |

**Table S4** The coordinates of C6

| atom | X           | Y           | Z           |
|------|-------------|-------------|-------------|
| C    | 0.58821000  | 1.38668500  | -0.05552200 |
| C    | -0.84175300 | 1.08935300  | -0.41166400 |
| C    | -1.38188700 | -0.15252400 | 0.27053100  |
| C    | -0.58822700 | -1.38694400 | -0.05538900 |
| C    | 0.84189400  | -1.08970900 | -0.41125200 |
| C    | 1.38191600  | 0.15239000  | 0.27064800  |
| N    | 1.40263200  | -1.80035900 | -1.30882800 |
| N    | -0.96157700 | -2.60564500 | -0.07671900 |
| N    | -2.30200400 | -0.23808200 | 1.14825600  |
| N    | -1.40240100 | 1.79953300  | -1.30965700 |
| N    | 0.96138300  | 2.60544600  | -0.07683200 |
| N    | 2.30203600  | 0.23821900  | 1.14838800  |
| N    | 2.77326600  | -1.39549400 | -1.65238900 |
| O    | 3.59447500  | -2.26787800 | -1.49468900 |
| O    | 2.89841300  | -0.27996500 | -2.12480500 |
| N    | -2.36467900 | -2.87709100 | 0.23141100  |
| O    | -3.13695100 | -2.72122200 | -0.68913000 |
| O    | -2.54517600 | -3.33419100 | 1.33651400  |
| N    | -2.97241200 | 1.02912000  | 1.48368300  |
| O    | -4.16599500 | 1.01177400  | 1.30340800  |
| O    | -2.26436200 | 1.89164900  | 1.96953200  |
| N    | -2.77269000 | 1.39479500  | -1.65289600 |
| O    | -2.89770100 | 0.28003000  | -2.12717600 |
| O    | -3.59428100 | 2.26652800  | -1.49313100 |
| N    | 2.36391100  | 2.87757800  | 0.23110700  |
| O    | 3.13614900  | 2.72279500  | -0.68970200 |
| O    | 2.54446000  | 3.33424700  | 1.33642700  |
| N    | 2.97254600  | -1.02876800 | 1.48405800  |
| O    | 4.16593600  | -1.01187700 | 1.30228300  |
| O    | 2.26490800  | -1.89067400 | 1.97157100  |

**Table S5** The coordinates of C7

| atom | X           | Y           | Z           |
|------|-------------|-------------|-------------|
| C    | -1.31654600 | 0.84874900  | -0.24192600 |
| C    | -0.34600900 | 1.546800000 | 0.67977200  |
| C    | 0.94067100  | 0.76909000  | 0.82877900  |
| C    | -1.55523500 | -0.57445700 | 0.21327700  |
| C    | 1.34991900  | -0.09144800 | -0.36546300 |
| C    | -0.77692900 | -1.59048500 | -0.58750200 |
| C    | 0.72700200  | -1.46875300 | -0.53682200 |
| N    | -2.21072500 | -0.74152600 | 1.29093300  |
| N    | -1.74022900 | 1.17382300  | -1.39627300 |
| N    | -0.50363800 | 2.58693000  | 1.39478800  |
| N    | 1.52376500  | 0.83511500  | 1.96093800  |
| N    | 2.15307300  | 0.23254900  | -1.30157100 |
| N    | 1.36484300  | -2.56180900 | -0.69709400 |
| N    | -1.24971100 | -2.47238600 | -1.37816900 |
| N    | -2.26836900 | -2.14009500 | 1.77152500  |
| O    | -3.38610900 | -2.55422500 | 1.94938500  |
| O    | -1.19114500 | -2.65955200 | 2.00617000  |
| N    | -1.33445500 | 2.49688700  | -1.87289200 |
| O    | -2.11223200 | 3.39645600  | -1.64752500 |
| O    | -0.30983100 | 2.49193300  | -2.52298900 |
| N    | -1.83317000 | 3.22538600  | 1.29159300  |
| O    | -1.78115100 | 4.42472200  | 1.17623400  |
| O    | -2.80118000 | 2.49476100  | 1.41256300  |
| N    | 2.76664900  | 0.08037700  | 2.09800700  |
| O    | 3.71608000  | 0.51277700  | 1.47094400  |
| O    | 2.70935800  | -0.82421700 | 2.89625600  |
| N    | 2.79406500  | 1.56520500  | -1.14940000 |
| O    | 2.09257600  | 2.47801200  | -0.74380900 |
| O    | 3.94089100  | 1.58113100  | -1.51015100 |
| N    | 2.82300500  | -2.48003900 | -0.72569700 |
| O    | 3.36638400  | -2.25822300 | 0.33808500  |
| O    | 3.29999300  | -2.74918800 | -1.80217700 |
| N    | -2.71123400 | -2.56385600 | -1.40888500 |
| O    | -3.14341200 | -3.60137100 | -0.95962900 |
| O    | -3.29451100 | -1.64462800 | -1.94902200 |

**Table S6** The coordinates of C8

| atom | X           | Y           | Z           |
|------|-------------|-------------|-------------|
| C    | 1.43139000  | 0.33127900  | -0.24596000 |
| C    | 1.24167700  | -1.13017800 | -0.57197900 |
| C    | 0.48269900  | 0.96562200  | 0.76091700  |
| C    | 0.60581200  | -2.02178400 | 0.47182400  |
| C    | -0.89233100 | 1.28846400  | 0.23415700  |
| C    | -0.75037800 | -1.62825600 | 0.98928100  |
| C    | -1.55361400 | 0.23557500  | -0.62857700 |
| C    | -1.76110900 | -1.12755500 | -0.02789000 |
| N    | 1.52505100  | -1.73118000 | -1.66288500 |
| N    | 2.33265700  | 0.94676200  | -0.90539500 |
| N    | 0.68594300  | 1.218600000 | 1.99383600  |
| N    | -1.56845600 | 2.35156100  | 0.41508800  |
| N    | -1.93176400 | 0.39122300  | -1.83776000 |
| N    | -2.68744200 | -1.96954500 | -0.27147400 |
| N    | -0.96571500 | -1.77920300 | 2.23835500  |
| N    | 1.07528100  | -3.11780700 | 0.92391400  |
| N    | 2.49294900  | 2.37714100  | -0.62801000 |
| O    | 2.96376100  | 2.65329000  | 0.45927700  |
| O    | 2.21446500  | 3.09019600  | -1.55988600 |
| N    | 2.09664000  | -0.96801600 | -2.77470900 |
| O    | 1.28439700  | -0.38737900 | -3.46117300 |
| O    | 3.28265000  | -1.13334600 | -2.92741100 |
| N    | 2.39097100  | -3.51316700 | 0.41218600  |
| O    | 2.36295200  | -4.49373300 | -0.29448000 |
| O    | 3.33774300  | -2.87970400 | 0.83165700  |
| N    | -2.30600300 | -1.37742100 | 2.66860400  |
| O    | -2.94895400 | -2.25691700 | 3.18568100  |
| O    | -2.57509700 | -0.19426500 | 2.52953500  |
| N    | -3.73379000 | -1.58569100 | -1.23183200 |
| O    | -3.64757200 | -2.14927400 | -2.29674700 |
| O    | -4.59605600 | -0.85828600 | -0.79170300 |
| N    | -1.69395000 | 1.72227800  | -2.41394900 |
| O    | -0.52794500 | 2.03078600  | -2.56581200 |
| O    | -2.70317000 | 2.29837700  | -2.73577200 |
| N    | -0.92295600 | 3.41114000  | 1.20983300  |
| O    | -0.00988300 | 3.98999100  | 0.65709700  |
| O    | -1.45972800 | 3.62281700  | 2.26831400  |
| N    | 2.02845500  | 0.84783100  | 2.49898900  |
| O    | 2.45960800  | -0.24038100 | 2.14828300  |
| O    | 2.49408400  | 1.65150900  | 3.26137000  |

**Table S7** The formula and the quantity of decomposition products of the designed compounds

| compd. | formula                                        | Quantity of decomposition products (mol) |                  |    |                 |                |          |
|--------|------------------------------------------------|------------------------------------------|------------------|----|-----------------|----------------|----------|
|        |                                                | N <sub>2</sub>                           | H <sub>2</sub> O | CO | CO <sub>2</sub> | O <sub>2</sub> | n totale |
| C3     | C <sub>3</sub> N <sub>6</sub> O <sub>6</sub>   | 3                                        | 0                | 0  | 3               | 0              | 6        |
| C4     | C <sub>4</sub> N <sub>8</sub> O <sub>8</sub>   | 4                                        | 0                | 0  | 4               | 0              | 8        |
| C5     | C <sub>5</sub> N <sub>10</sub> O <sub>10</sub> | 5                                        | 0                | 0  | 5               | 0              | 10       |
| C6     | C <sub>6</sub> N <sub>12</sub> O <sub>12</sub> | 6                                        | 0                | 0  | 6               | 0              | 12       |
| C7     | C <sub>7</sub> N <sub>14</sub> O <sub>14</sub> | 7                                        | 0                | 0  | 7               | 0              | 14       |
| C8     | C <sub>8</sub> N <sub>16</sub> O <sub>16</sub> | 8                                        | 0                | 0  | 8               | 0              | 16       |



**Table S8** The oxygen balance ( $OB_{100}$ ) and the net charge of the nitro group ( $Q_{NO_2}$ ) of the designed compounds

| Compd. | $OB_{100}$ | $Q_{NO_2}$ |
|--------|------------|------------|
| C3     | 2.78       | -0.0708    |
| C4     | 2.78       | -0.0597    |
| C5     | 2.78       | -0.0411    |
| C6     | 2.78       | -0.0538    |
| C7     | 2.78       | -0.0261    |
| C8     | 2.78       | -0.0264    |

**Table S9** Calculated the heats of formation ( $HOF_{\text{solid}}$ ), detonation performance (D and P), power index,  $BDE$  and  $h_{50}$  of C3 and C6 at the MP2/ 6-31G(d,p) level.

| Compd. | $HOF_{\text{gas}}$<br>(kJ mol <sup>-1</sup> ) | $HOF_{\text{solid}}$<br>(kJ mol <sup>-1</sup> ) | $D$<br>(km s <sup>-1</sup> ) | $P$<br>(GPa) | power<br>index % | $BDE$ (kJ mol <sup>-1</sup> ) |            | $h_{50}$<br>(cm) |
|--------|-----------------------------------------------|-------------------------------------------------|------------------------------|--------------|------------------|-------------------------------|------------|------------------|
|        |                                               |                                                 |                              |              |                  | N-NO <sub>2</sub>             | C-C (ring) |                  |
| C3     | 782.09                                        | 698.62                                          | 9.66                         | 42.73        | 112.80           | 168.07                        | 177.13     | 117              |
| C6     | 1078.12                                       | 923.31                                          | 9.17                         | 37.87        | 98.59            | 178.08                        | 249.15     | 85               |

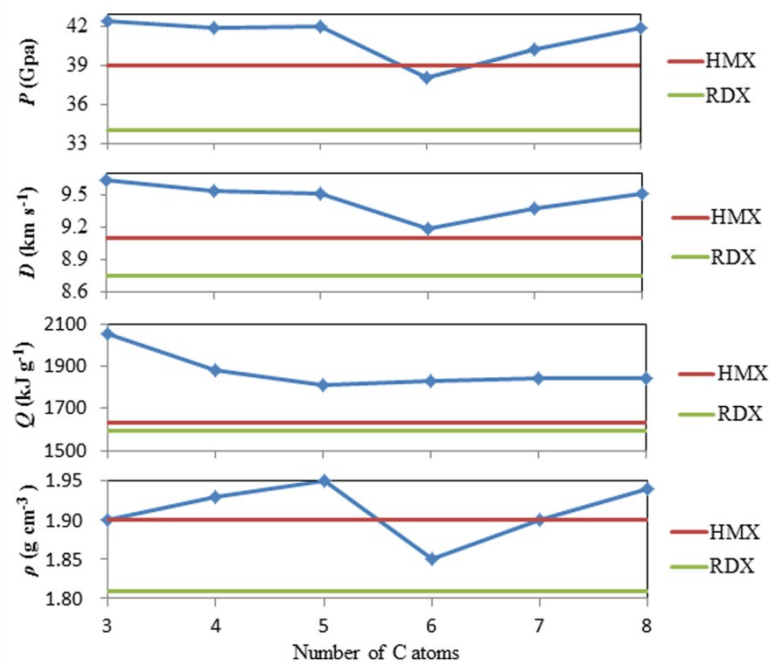

**Figure S1** Crystal densities ( $\rho$ ), heats of detonation ( $Q$ ), detonation velocities ( $D$ ) and detonation pressure ( $P$ ) versus the number of C atoms for all designed compounds, HMX and RDX.
